# Supplementary material for: Multivariable prediction models of caries increment: a systematic review and critical appraisal
Source: Research Square preprint supplement (doi:10.21203/rs.3.rs-1562261/v1), 2022-05-12
Supplement: Supplementary file 1 [file 21737ee01dc286fa831bd3ef.xlsx]

## Sheet: Blad1
Additional File 5. Responses to signalling questions of PROBAST [6] in studies of multivariable models of caries increment.
Y=yes; PY=probably yes; N=no, PN=probably no; NI=no information NA=not applicable
				Participants			Predictors				Outcome							Analysis										Overall ROB
				1.1. Were appropriate data sources used, e.g., cohort, RCT, or nested case–control study data?	1.2. Were all inclusions and exclusions of participants appropriate?	ROB level	2.1. Were predictors defined and assessed in a similar way for all participants?	2.2 2.2 Were predictor assessments made without knowledge of outcome data?	2.3. Are all predictors available at the time the model is intended to be used?	ROB level	3.1. Was the outcome determined appropriately?	3.2. Was a prespecified or standard outcome definition used?	3.3. Were predictors excluded from the outcome definition?	3.4. Was the outcome defined and determined in a similar way for all participants?	3.5. Was the outcome determined without knowledge of predictor information?	3.6. Was the time interval between predictor assessment and outcome determination appropriate?	ROB level	4.1. Were there a reasonable number of participants with the outcome?	4.2. Were continuous and categorical predictors handled appropriately?	4.3. Were all enrolled participants included in the analysis?	4.4. Were participants with missing data handled appropriately?	4.5. Was selection of predictors based on univariable analysis avoided?*	4.6 Were complexities in the data accounted for appropriately?	4.7 Were relevant model performance measures evaluated appropriately?	4.8 Were model overfitting, underfitting, and optimism in model performance accounted for?*	4.9 Do predictors and their assigned weights in the final model correspond to the results from the reported multivariable analysis?*	ROB level
Studies of model development
Angulo, 1995 [16]				NI	NI	High	PY	Y	Y	Low	N	Y	Y	Y	NI	Y	High	N	N	Y	Y	Y	NI	N	N	NI	High	High
Demers, 1992 [17]				Y	PY	Low	Y	Y	Y	Low	Y	Y	Y	Y	NI	Y	Low	PY	N	Y	Y	N	NI	N	N	NI	High	High
Disney, 1992 [18]				Y	Y	Low	Y	Y	Y	Low	Y	Y	Y	Y	Y	Y	Low	N	N	Y	Y	Y	NI	N	NI	NI	High	High
Fontana, 2010 [19]				Y	Y	Low	PY	Y	PY	Low	Y	Y	Y	Y	NI	Y	Low	N	NI	PY	NI	PY	NI	N	N	NI	High	High
Gao, 2010 [20]				Y	Y	Low	Y	Y	Y	Low	Y	Y	Y	Y	Y	Y	Low	Y	PY	Y	PY	Y	NI	N	N	NI	High	High
Hänsel Petersson, 2002 [21]				Y	Y	Low	Y	Y	Y	Low	PY	Y	Y	Y	NI	Y	Unclear	N	N	Y	Y	Y	NI	N	N	NI	High	High
Pang, 2021 [22]				Y	NI	Unclear	Y	Y	Y	Low	N	Y	Y	Y	NI	Y	High	N	PY	Y	PY	N	NI	Y	Y	NI	High	High
Powell, 1991 [23]				Y	NI	Unclear	NI	Y	Y	Unclear	N	NI	Y	PY	NI	Y	High	N	NI	Y	Y	N	NI	N	NI	NI	High	High
Ritter, 2016 [24]				Y	Y	Low	N	Y	Y	High	NI	Y	Y	Y	NI	Y	Unclear	N	NI	N	Y	N	NI	N	Y	NI	High	High
Sanchez-Garcia, 2011 [25]				Y	Y	Low	Y	Y	Y	Low	Y	Y	Y	Y	NI	Y	Low	N	N	Y	Y	Y	NI	N	N	NI	High	High
Sánchez-Pérez, 2009 [26]				Y	Y	Low	Y	Y	Y	Low	Y	Y	Y	Y	NI	Y	Low	N	N	Y	NI	N	NI	N	NI	NI	High	High
Studies of model validation
Beck, 1992 [27]				Y	Y	Low	Y	Y	Y	Low	Y	Y	Y	Y	Y	Y	Low	PY	PY	PY	NI	NA	NI	N	NA	NA	High	High
Birpou, 2019 [28]				PY	Y	Unclear	PY	Y	Y	Low	N	Y	Y	Y	NI	Y	High	N	Y	PY	NI	NA	NI	N	NA	NA	High	High
Campus, 2012 [29]				Y	PY	Low	Y	Y	Y	Low	Y	Y	Y	Y	NI	Y	Low	Y	NI	Y	Y	NA	NI	N	NA	NA	High	High
Christian, 2020 [30]				Y	PY	Low	Y	Y	Y	Low	PN	Y	Y	Y	NI	Y	High	N	NI	PY	NI	NA	NI	N	NA	NA	High	High
Dolic, 2020 [31]				Y	PN	High	Y	Y	Y	Low	Y	Y	Y	Y	Y	Y	Low	N	Y	Y	NI	NA	NI	N	NA	NA	High	High
Gao, 2013 [32]				Y	Y	Low	Y	Y	Y	Low	PY	Y	Y	Y	Y	Y	Low	Y	NI	Y	Y	NA	NI	N	NA	NA	High	High
Hänsel Petersson, 2015 [33]				Y	Y	Low	PY	Y	Y	Low	NI	Y	Y	Y	NI	Y	Unclear	N	Y	Y	Y	NA	NI	N	NA	NA	High	High
Hänsel Petersson, 2010 [34]				Y	Y	Low	Y	Y	Y	Low	Y	Y	Y	Y	NI	Y	Low	Y	Y	Y	Y	NA	NI	N	NA	NA	High	High
Hayes, 2017 [35]				Y	Y	Low	PY	Y	Y	Low	Y	Y	Y	Y	NI	Y	Low	N	PY	Y	Y	NA	NI	N	NA	NA	High	High
Holgerson, 2009 [36]				Y	PY	Low	PY	Y	Y	Low	N	Y	Y	Y	NI	Y	High	N	NI	Y	Y	NA	NI	N	NA	NA	High	High
Pang, 2021 [22]				Y	NI	Unclear	Y	Y	Y	Low	N	Y	Y	Y	NI	Y	High	Y	PY	Y	PY	NA	NI	Y	NA	NA	Unclear	High
